# Supplementary material
Source: publisher figshare collection journal article supplement (https://acs.figshare.com/ndownloader/files/23297588)
Supplement: Supplementary file 1 [file 23297588]

---

## Supporting Information

### The Effects of Annealing Time on Triple Cation Perovskite Films and Their Solar Cells

*Liuwen Tian, † Wenfeng Zhang, \* † Yuelong Huang, \* † Fang Wen, † Hua Yu, † Yuepeng Li, †*

*Qiyun Wang, † Changtao Peng, † Zhu Ma, † Taotao Hu, † Lin Du † and Meng Zhang †*

†Institute of Photovoltaic, Southwest Petroleum University, Chengdu 610500, China

#### AUTHOR INFORMATION

##### Corresponding Authors

\*E-mail: wfzhang@mail.ustc.edu.cn

\*E-mail: y.huang@swpu.edu.cn

## Supplementary Figures and Tables:

**Table S1.** Fitting results of EIS parameters for the PSCs under dark condition.

| Annealing time | $R_s (\Omega)$ | $R_r (\Omega)$ | $C_d (F)$ |
|----------------|----------------|----------------|-----------|
| 45 min         | 10.35          | 2729           | 1.66E-08  |
| 60 min         | 18.27          | 2500           | 1.74E-08  |
| 80 min         | 19.24          | 2183           | 1.71E-08  |
| 100 min        | 18.90          | 1808           | 1.70E-08  |

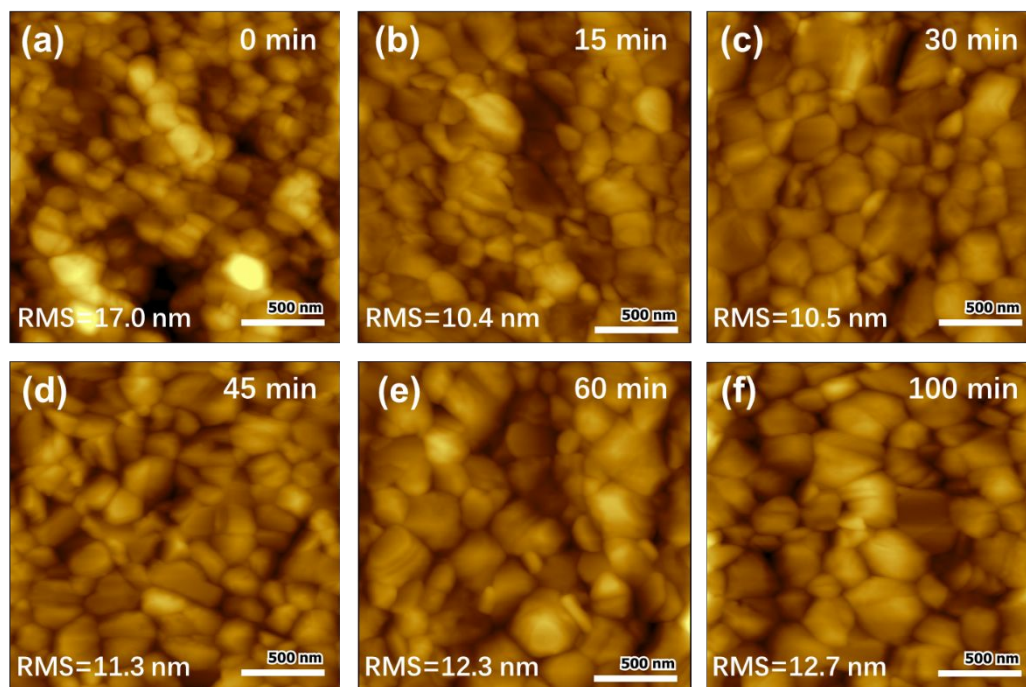

**Figure S1.** AFM images of CsFAMA perovskite films deposited on glass/ITO/SnO<sub>2</sub> substrates annealed for different periods.

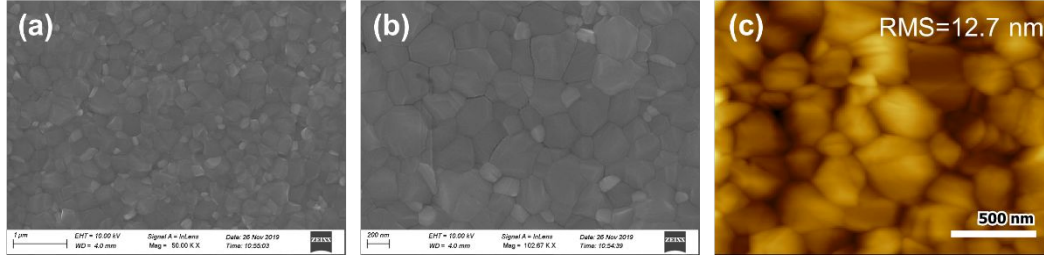

**Figure S2.** SEM (a-b) and AFM (c) images of 100 min annealed CsFAMA perovskite films. Note that these off-white grains are  $\text{PbI}_2$  phase.

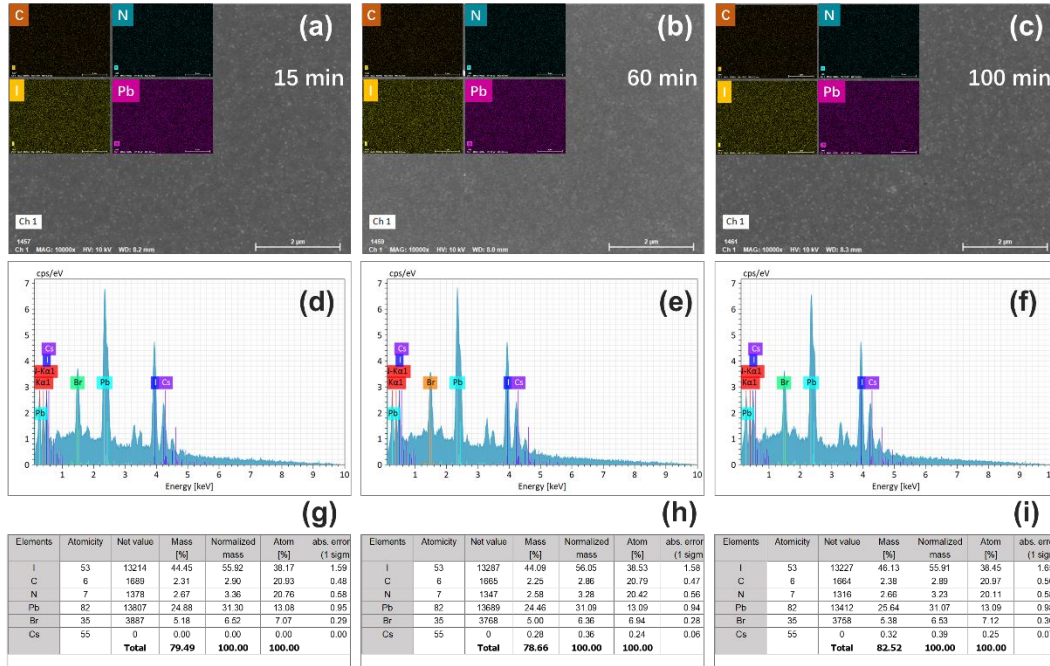

**Figure S3.** Surface elements analysis of CsFAMA films with different annealing time at 100 °C. (a-c) SEM images (a) and corresponding elemental mappings. (d-f) Energy spectra of corresponding films. (g-i) Element content analysis results of corresponding films.

**Table S2.** Fitting results of TRPL decay of Figure 5(c) and (d) via a bi-exponential decay function of the form as  $R(t)=B_1\exp(-t/\tau_1)+B_2\exp(-t/\tau_2)$

| PbI <sub>2</sub> content | Annealing time | $\tau_1$ (ns) | Fraction 1 (%) | $\tau_2$ (ns) | Fraction 2 (%) | $\chi^2$ |
|--------------------------|----------------|---------------|----------------|---------------|----------------|----------|
| 5 mol% excess            | 0 min          | 5.7           | 0.21           | 924.5         | 99.79          | 1.072    |
|                          | 5 min          | 3.6           | 0.88           | 405.9         | 99.12          | 1.016    |
|                          | 10 min         | 5.3           | 1.78           | 238.6         | 98.22          | 1.075    |
|                          | 15 min         | 3.5           | 2.98           | 166.7         | 97.02          | 1.099    |
|                          | 20 min         | 3.3           | 4.34           | 106.0         | 95.66          | 1.005    |
|                          | 30 min         | 4.5           | 5.54           | 103.1         | 94.46          | 1.026    |
|                          | 45 min         | 3.5           | 7.41           | 79.9          | 92.59          | 1.063    |
|                          | 60 min         | 2.8           | 8.47           | 64.4          | 91.53          | 1.026    |
|                          |                |               |                |               |                |          |
| Without excess           | 0 min          | 24.0          | 0.77           | 709.0         | 99.23          | 1.002    |
|                          | 5 min          | 21.6          | 48.93          | 138.0         | 51.07          | 1.268    |
|                          | 10 min         | 10.7          | 54.56          | 55.5          | 45.44          | 1.250    |
|                          | 15 min         | 10.3          | 64.54          | 53.4          | 35.46          | 1.282    |
|                          | 20 min         | 7.4           | 60.74          | 32.5          | 39.26          | 1.236    |
|                          | 30 min         | 3.7           | 18.11          | 22.3          | 81.89          | 1.185    |
|                          | 45 min         | 2.4           | 20.25          | 58.8          | 79.75          | 1.179    |
|                          | 60 min         | 3.2           | 10.00          | 68.8          | 90.00          | 1.195    |

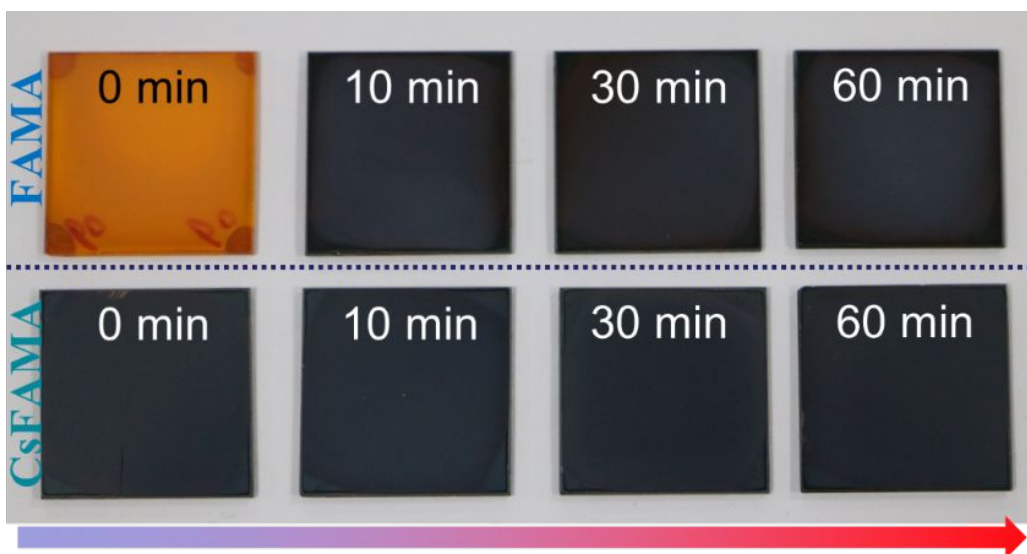

**Figure S4.** Photographs of FAMA and CsFAMA perovskite films with respect to annealing time at 100 °C.

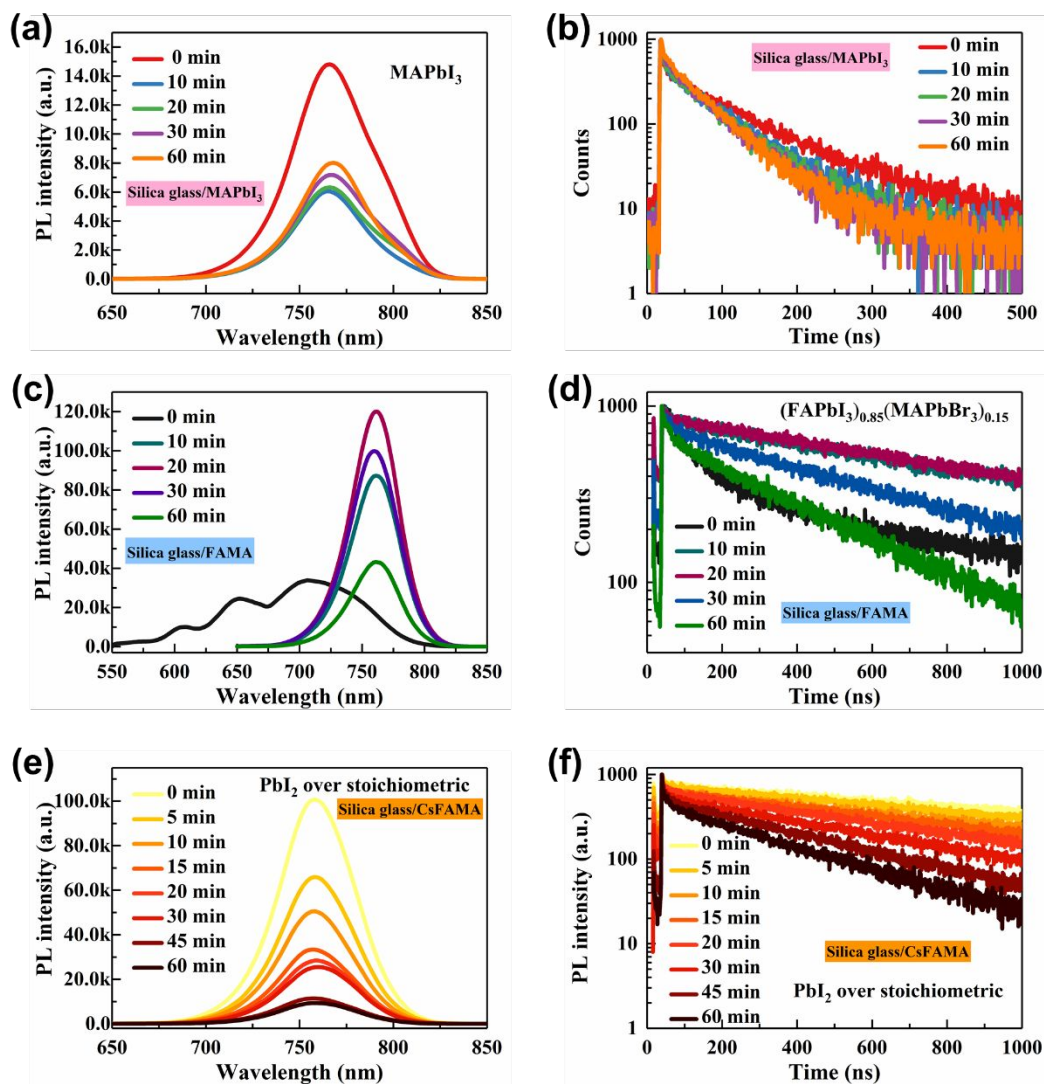

**Figure S5.** PL spectra and TRPL decay of MAPbI<sub>3</sub> (a-b), FAMA (c-d), CsFAMA (e-f) perovskite films deposited on silica glass substrates as a function of annealing time at 100 °C.

**Table S3.** Fitting results of TRPL decay of Figure S4(b), (d) and (f) via a bi-exponential decay function of the form as  $R(t)=B_1\exp(-t/\tau_1)+B_2\exp(-t/\tau_2)$

| Perovskite material | Annealing time | $\tau_1$ (ns) | Fraction 1 (%) | $\tau_2$ (ns) | Fraction 2 (%) | $\chi^2$ |
|---------------------|----------------|---------------|----------------|---------------|----------------|----------|
| MAPbI <sub>3</sub>  | 0 min          | 4.1           | 4.43           | 92.8          | 95.57          | 1.054    |
|                     | 5 min          | 4.8           | 7.23           | 70.1          | 92.77          | 1.179    |
|                     | 10 min         | 4.0           | 6.12           | 64.2          | 93.88          | 1.291    |
|                     | 20 min         | 4.3           | 6.72           | 55.4          | 93.28          | 1.152    |
|                     | 30 min         | 5.3           | 5.61           | 53.3          | 94.39          | 1.123    |
|                     |                |               |                |               |                |          |
| FAMA                | 0 min          | 57.3          | 15.46          | 434.0         | 84.54          | 1.061    |
|                     | 10 min         | 17.6          | 0.43           | 856.5         | 99.57          | 1.056    |
|                     | 20 min         | 17.6          | 0.22           | 1026.9        | 99.78          | 1.030    |
|                     | 30 min         | 15.8          | 0.97           | 561.          | 99.01          | 1.021    |
|                     | 60 min         | 18.6          | 2.12           | 400.3         | 97.88          | 1.035    |
|                     |                |               |                |               |                |          |
| CsFAMA              | 0 min          | 18.8          | 0.25           | 1274.0        | 99.75          | 1.041    |
|                     | 5 min          | 6.4           | 0.27           | 1006.2        | 99.73          | 0.989    |
|                     | 10 min         | 7.8           | 0.36           | 883.2         | 99.64          | 1.093    |
|                     | 15 min         | 7.9           | 0.44           | 800.2         | 99.56          | 0.976    |
|                     | 20 min         | 12.4          | 0.62           | 610.0         | 99.38          | 1.080    |
|                     | 30 min         | 5.0           | 0.94           | 505.1         | 99.06          | 1.099    |
|                     | 45 min         | 5.8           | 1.61           | 377.1         | 98.39          | 1.013    |
|                     | 60 min         | 7.6           | 2.35           | 302.2         | 97.65          | 1.103    |



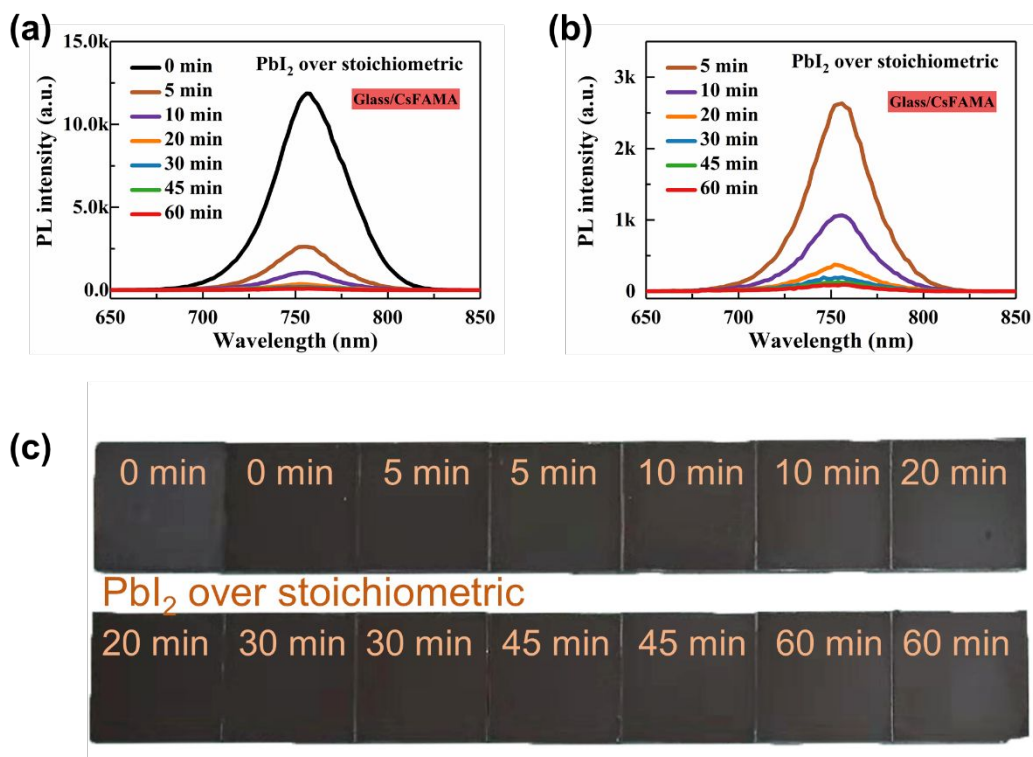

**Figure S6.** (a-b) PL spectra of CsFAMA perovskite films with different heating time at 100 °C with PbI<sub>2</sub> excessively added (5 mol% excess) in precursor solution. (c) Photographs of CsFAMA perovskite films deposited on glass substrates as a function of annealing time at 100 °C.

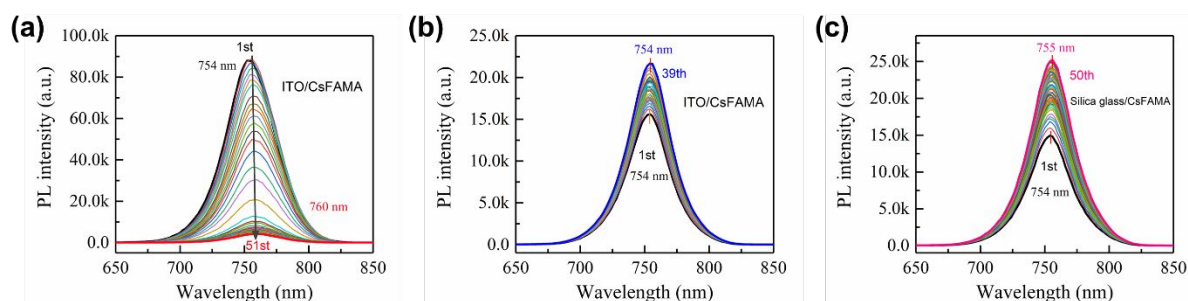

**Figure S7.** Two-dimensional PL spectra over time of CsFAMA perovskite films without (a) or with annealing for 10 min (b) and 45 min (c), respectively. They are corresponding to the three-dimensional PL spectra in Figure 6(a), (b) and (c), respectively.



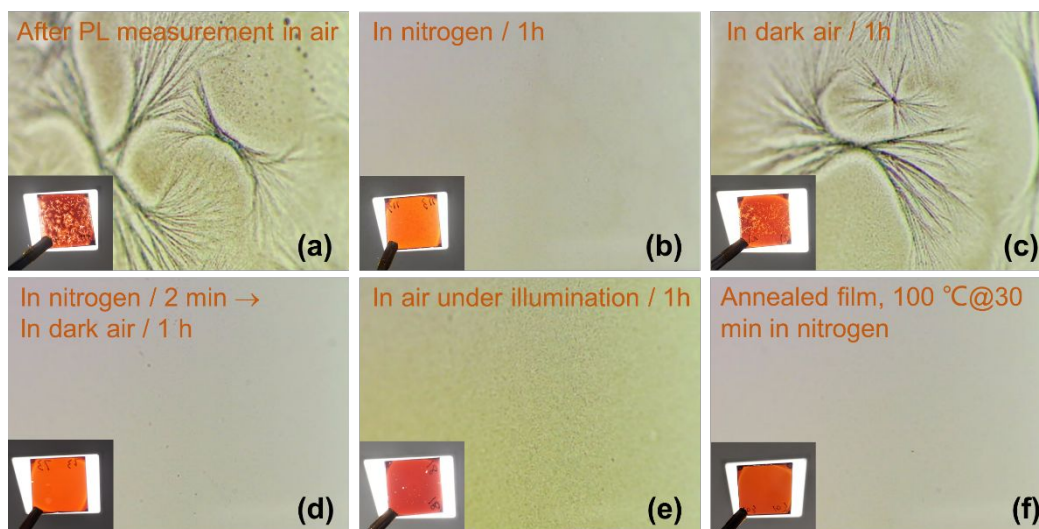

**Figure S8.** Mesoscopic morphologies and photographs of CsFAMA perovskite films placed in different environments as soon as anti-solvent dripping. (a) After PL measurement. (b) In nitrogen for 1 h. (c) In dark air for 1 h. (d) In nitrogen for 2 min, and then in dark air for 1 h. (e) In air under one sun illumination for 1 h. (f) Annealed at 100 °C for 30 min in glovebox. Insets are photographs of corresponding perovskite films.

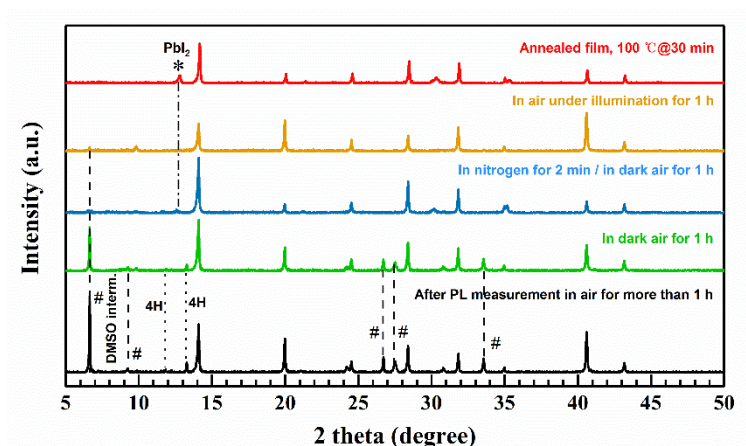

**Figure S9.** XRD patterns of perovskite films placed in different environments for certain periods as soon as anti-solvent dripping.

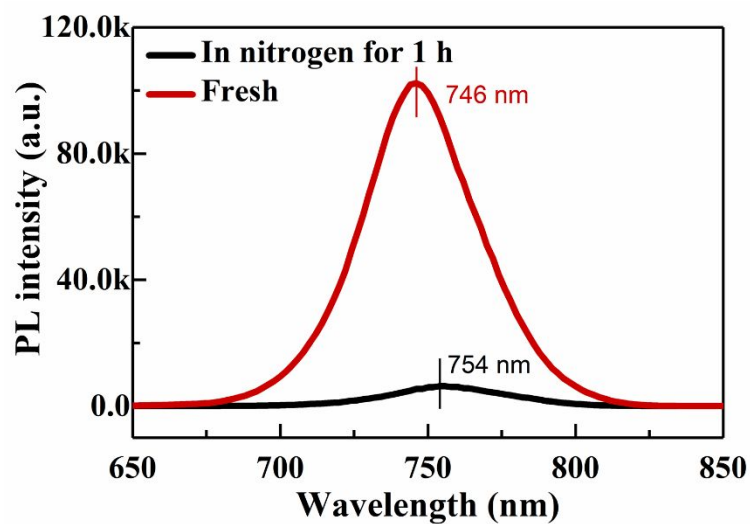

**Figure S10.** A comparison of PL spectra of fresh film after anti-solvent dripping and film placed in glovebox for 1 h. The PL intensity of fresh film is much stronger than that of film stored in glovebox for 1 h after CB dripping without annealing. The PL emission peak of fresh film exhibits blue shift.
